# Supplementary material for: An Advanced Rider-Cornering-Assistance System for PTW Vehicles Developed Using ML KNN Method
Source: MDPI journal article supplement (doi:10.3390/s23031540), 2023-01-31
Supplement: s1 [file s1]

# Supplementary

| Test | Vehicle                    | Characteristics of the vehicle |              |              | Contact road-tire      |             |                       |                          | Driver behaviour |          |                   |                          | Referent vehicle        |
|------|----------------------------|--------------------------------|--------------|--------------|------------------------|-------------|-----------------------|--------------------------|------------------|----------|-------------------|--------------------------|-------------------------|
|      |                            | $R_n$                          | $R_f$<br>(m) | $R_r$<br>(m) | $Ml_{Tire}$<br>(ratio) | $\mu_{lat}$ | $P_{Tire}$<br>(ratio) | $Tire_{Type}$<br>(ratio) | $C_{veh}$        | $C_{ct}$ | $Time$<br>(ratio) | $Ml_{driver}$<br>(ratio) | $C_{position}$<br>(1/m) |
| P1   | HONDA<br>CBR500R/F/X       | 0.017                          | 0.182        | 0.201        | 0.29                   | 0.80        | 1.0343                | 0.56                     | 0.7558           | 0.6817   | 0.7               | 0.5                      | 0.01                    |
| P2   | LAGENDA<br>115 R6          | 0.012                          | 0.180        | 0.178        | 0.25                   | 0.90        | 0.5000                | 0.76                     | 0.8044           | 1.0988   | 0.7               | 0.5                      | 0.02                    |
| P3   | LAGENDA<br>115 FZ150       | 0.019                          | 0.117        | 0.121        | 0.42                   | 0.84        | 0.5000                | 0.94                     | 0.7200           | 1.1731   | 0.7               | 0.7                      | 0.02                    |
| P4   | HONDA<br>CBR500R/F/X       | 0.017                          | 0.180        | 0.195        | 0.05                   | 0.44        | 1.1060                | 0.26                     | 0.7568           | 1.4538   | 0.7               | 0.8                      | 0.01                    |
| P5   | HONDA<br>CB650F            | 0.016                          | 0.202        | 0.218        | 0.22                   | 0.57        | 0.5000                | 0.26                     | 0.7534           | 0.6444   | 0.9               | 0.8                      | 0.03                    |
| P6   | LAGENDA<br>115 XJ6         | 0.012                          | 0.205        | 0.212        | 0.31                   | 0.71        | 1.2020                | 0.64                     | 0.8141           | 0.6418   | 0.9               | 0.5                      | 0.05                    |
| P7   | LAGENDA<br>115 XV950R      | 0.021                          | 0.254        | 0.239        | 0.24                   | 0.39        | 0.5000                | 0.28                     | 0.6882           | 0.4077   | 0.7               | 0.5                      | 0.05                    |
| P8   | BOLT<br>HONDA<br>CB650F    | 0.019                          | 0.207        | 0.210        | 0.46                   | 0.21        | 0.5000                | 0.28                     | 0.7011           | 1.2042   | 0.9               | 0.5                      | 0.01                    |
| P9   | LAGENDA<br>115 R1          | 0.012                          | 0.190        | 0.190        | 0.77                   | 0.44        | 0.5000                | 0.71                     | 0.8040           | 0.8822   | 0.7               | 0.5                      | 0.01                    |
| P10  | LAGENDA<br>115 NMAX<br>155 | 0.012                          | 0.125        | 0.117        | 0.90                   | 0.56        | 0.6346                | 0.91                     | 0.7924           | 0.0945   | 0.7               | 0.5                      | 0.05                    |
| P11  | HONDA<br>NC750X            | 0.011                          | 0.223        | 0.203        | 0.55                   | 0.56        | 0.5000                | 0.73                     | 0.7905           | 0.4427   | 0.7               | 0.5                      | 0.05                    |
| P12  | LAGENDA<br>115 R6          | 0.018                          | 0.195        | 0.189        | 0.89                   | 0.95        | 1.0496                | 0.77                     | 0.6988           | 0.2171   | 0.7               | 0.5                      | 0.03                    |
| P13  | HONDA<br>NEW PCX           | 0.011                          | 0.134        | 0.138        | 0.64                   | 0.28        | 0.7761                | 0.64                     | 0.8082           | 0.1591   | 0.7               | 0.7                      | 0.05                    |
| P14  | LAGENDA<br>115 FZ150       | 0.012                          | 0.147        | 0.122        | 0.49                   | 0.12        | 1.2406                | 0.50                     | 0.7817           | 0.2158   | 0.7               | 0.5                      | 0.01                    |
| P15  | LAGENDA<br>115 Y15ZR       | 0.010                          | 0.122        | 0.105        | 0.10                   | 0.82        | 0.6655                | 0.52                     | 0.7931           | 1.2216   | 0.9               | 0.7                      | 0.01                    |
| P16  | LAGENDA<br>115 MT09        | 0.014                          | 0.183        | 0.196        | 0.80                   | 0.51        | 0.5000                | 0.82                     | 0.7981           | 0.0985   | 0.7               | 0.8                      | 0.05                    |
| P17  | HONDA<br>MSX125            | 0.013                          | 0.116        | 0.093        | 0.73                   | 0.51        | 0.8882                | 0.16                     | 0.7325           | 0.6152   | 0.8               | 0.5                      | 0.05                    |
| P18  | LAGENDA<br>115 LC135       | 0.017                          | 0.111        | 0.115        | 0.25                   | 0.65        | 1.4923                | 0.19                     | 0.7084           | 1.1549   | 0.7               | 0.5                      | 0.03                    |
| P19  | LAGENDA<br>115 FZ150       | 0.018                          | 0.118        | 0.146        | 0.58                   | 0.03        | 0.5000                | 0.63                     | 0.7725           | 0.1416   | 0.7               | 0.5                      | 0.05                    |
| P20  | HONDA<br>CBR250R           | 0.015                          | 0.164        | 0.139        | 0.28                   | 0.53        | 0.8175                | 0.81                     | 0.7178           | 1.1342   | 0.8               | 0.7                      | 0.02                    |
| P21  | LAGENDA<br>115 NMAX<br>155 | 0.016                          | 0.116        | 0.124        | 0.19                   | 0.31        | 0.9558                | 0.79                     | 0.7525           | 2.6715   | 0.7               | 0.5                      | 0.01                    |
| P22  | HONDA<br>CBR1000RR         | 0.014                          | 0.190        | 0.200        | 0.68                   | 0.31        | 0.5000                | 0.29                     | 0.7763           | 0.9908   | 0.7               | 0.5                      | 0.01                    |

|     |                                |       |       |       |      |      |        |      |        |        |     |     |      |
|-----|--------------------------------|-------|-------|-------|------|------|--------|------|--------|--------|-----|-----|------|
| P23 | LAGENDA<br>115 MT09            | 0.017 | 0.185 | 0.198 | 0.95 | 0.53 | 1.0687 | 0.40 | 0.7497 | 0.5666 | 0.7 | 0.9 | 0.03 |
| P24 | LAGENDA<br>115 FZ150           | 0.015 | 0.125 | 0.141 | 0.57 | 0.20 | 0.7022 | 0.76 | 0.8000 | 0.5664 | 1.0 | 0.9 | 0.01 |
| P25 | HONDA<br>CBR1000RR             | 0.017 | 0.211 | 0.205 | 0.83 | 0.13 | 0.5000 | 0.97 | 0.7113 | 0.0625 | 0.7 | 0.5 | 0.05 |
| P26 | HONDA<br>NEW PCX               | 0.013 | 0.111 | 0.119 | 0.59 | 0.48 | 1.2013 | 0.92 | 0.7820 | 0.2840 | 0.9 | 0.5 | 0.05 |
| P27 | HONDA<br>CB650F                | 0.010 | 0.206 | 0.223 | 0.31 | 0.36 | 0.5000 | 0.90 | 0.8506 | 0.3836 | 0.7 | 0.5 | 0.05 |
| P28 | HONDA<br>FUTURE125             | 0.015 | 0.120 | 0.117 | 0.37 | 0.02 | 0.5000 | 0.11 | 0.7081 | 0.3639 | 0.8 | 0.8 | 0.05 |
| P29 | HONDA<br>CBR500R/F/X           | 0.014 | 0.188 | 0.205 | 0.75 | 0.61 | 1.0953 | 0.02 | 0.7945 | 0.2961 | 0.7 | 0.6 | 0.05 |
| P30 | HONDA<br>CBR250R               | 0.015 | 0.167 | 0.154 | 0.46 | 0.68 | 1.1238 | 0.41 | 0.7320 | 0.5043 | 0.8 | 0.7 | 0.05 |
| P31 | LAGENDA<br>115 NMAX<br>155     | 0.012 | 0.134 | 0.135 | 0.76 | 0.23 | 1.0223 | 0.90 | 0.8085 | 0.0931 | 0.7 | 0.5 | 0.05 |
| P32 | LAGENDA<br>115 NMAX<br>155     | 0.011 | 0.140 | 0.142 | 0.64 | 0.69 | 0.5860 | 1.00 | 0.8111 | 0.2745 | 0.7 | 0.5 | 0.05 |
| P33 | HONDA<br>CBR250R               | 0.010 | 0.139 | 0.142 | 0.93 | 0.67 | 1.3760 | 0.13 | 0.8392 | 0.6115 | 0.9 | 0.9 | 0.05 |
| P34 | LAGENDA<br>115 MT09            | 0.010 | 0.181 | 0.193 | 0.36 | 0.07 | 0.5000 | 0.61 | 0.8520 | 0.1187 | 0.7 | 0.5 | 0.05 |
| P35 | HONDA<br>CBR250R               | 0.009 | 0.159 | 0.166 | 0.99 | 0.75 | 0.5000 | 0.58 | 0.8514 | 0.5283 | 1.0 | 0.5 | 0.05 |
| P36 | HONDA<br>NC750X                | 0.013 | 0.214 | 0.217 | 0.06 | 0.24 | 0.5000 | 0.65 | 0.7822 | 0.4491 | 0.7 | 0.5 | 0.05 |
| P37 | HONDA<br>NC750X                | 0.011 | 0.226 | 0.208 | 0.13 | 0.82 | 1.0745 | 0.10 | 0.8027 | 1.2132 | 0.7 | 0.8 | 0.01 |
| P38 | LAGENDA<br>115 FZ150           | 0.011 | 0.118 | 0.128 | 0.18 | 0.95 | 1.3799 | 0.02 | 0.8500 | 0.9411 | 0.7 | 0.6 | 0.05 |
| P39 | LAGENDA<br>115 FZ150           | 0.018 | 0.139 | 0.126 | 0.43 | 0.06 | 1.2622 | 0.77 | 0.6997 | 0.1856 | 0.8 | 0.5 | 0.03 |
| P40 | LAGENDA<br>115 MT09            | 0.011 | 0.179 | 0.182 | 0.35 | 0.72 | 0.6535 | 0.48 | 0.8361 | 0.6165 | 0.7 | 0.5 | 0.05 |
| P41 | LAGENDA<br>115 LC135           | 0.010 | 0.096 | 0.102 | 0.32 | 0.55 | 1.1486 | 0.39 | 0.8328 | 0.6313 | 0.7 | 0.5 | 0.05 |
| P42 | HONDA<br>CBR500R/F/X           | 0.016 | 0.189 | 0.205 | 0.35 | 0.16 | 0.6511 | 0.01 | 0.7713 | 0.4114 | 0.7 | 0.7 | 0.02 |
| P43 | LAGENDA<br>115 EGO-<br>AVANTIZ | 0.012 | 0.092 | 0.113 | 0.47 | 0.60 | 0.5000 | 0.88 | 0.8556 | 0.4570 | 0.7 | 0.5 | 0.05 |
| P44 | LAGENDA<br>115 FZ150           | 0.018 | 0.139 | 0.121 | 0.15 | 0.24 | 1.1971 | 0.11 | 0.6884 | 0.4371 | 0.7 | 0.5 | 0.05 |
| P45 | HONDA<br>MSX125                | 0.011 | 0.087 | 0.103 | 0.86 | 0.56 | 0.5000 | 0.72 | 0.8488 | 0.2491 | 0.7 | 0.5 | 0.03 |
| P46 | HONDA<br>FUTURE125             | 0.011 | 0.118 | 0.093 | 0.65 | 0.42 | 1.2596 | 0.15 | 0.7394 | 0.4785 | 0.8 | 0.5 | 0.05 |
| P47 | LAGENDA<br>115 FZ150           | 0.015 | 0.134 | 0.136 | 0.75 | 0.69 | 0.5000 | 0.07 | 0.7709 | 0.8541 | 0.8 | 0.6 | 0.05 |
| P48 | LAGENDA<br>115 XMAX<br>250     | 0.015 | 0.196 | 0.208 | 0.42 | 0.84 | 0.8418 | 0.28 | 0.7297 | 0.8152 | 0.7 | 0.6 | 0.05 |

|     |                               |       |       |       |      |      |        |      |        |        |     |     |      |
|-----|-------------------------------|-------|-------|-------|------|------|--------|------|--------|--------|-----|-----|------|
| P49 | LAGENDA<br>115 NMAX<br>155    | 0.011 | 0.116 | 0.118 | 0.39 | 0.51 | 0.5000 | 0.86 | 0.8134 | 0.4478 | 0.7 | 0.7 | 0.05 |
| P50 | LAGENDA<br>115 LC135          | 0.012 | 0.115 | 0.120 | 0.10 | 0.11 | 0.5000 | 0.13 | 0.7922 | 1.1535 | 0.7 | 0.5 | 0.03 |
| P51 | LAGENDA<br>115 XV950R<br>BOLT | 0.019 | 0.256 | 0.236 | 0.79 | 0.39 | 1.3705 | 0.47 | 0.7171 | 0.9403 | 0.7 | 0.5 | 0.05 |
| P52 | LAGENDA<br>115 MT09           | 0.013 | 0.178 | 0.184 | 0.01 | 0.42 | 1.3366 | 0.60 | 0.8053 | 0.4995 | 0.7 | 0.5 | 0.05 |
| P53 | HONDA<br>CB650F               | 0.012 | 0.204 | 0.201 | 0.38 | 0.29 | 1.0405 | 0.89 | 0.7993 | 0.3686 | 0.8 | 0.9 | 0.03 |
| P54 | LAGENDA<br>115 R1             | 0.017 | 0.185 | 0.197 | 0.02 | 0.05 | 0.5543 | 0.32 | 0.7430 | 0.2346 | 0.7 | 1.0 | 0.05 |
| P55 | HONDA<br>CB650F               | 0.015 | 0.202 | 0.198 | 0.49 | 0.98 | 0.9547 | 0.96 | 0.7420 | 0.3527 | 0.8 | 0.9 | 0.05 |
| P56 | LAGENDA<br>115 MT09           | 0.012 | 0.182 | 0.181 | 0.03 | 0.13 | 1.4416 | 0.83 | 0.8154 | 0.2821 | 0.7 | 0.5 | 0.05 |
| P57 | HONDA<br>CBR500R/F/X          | 0.014 | 0.196 | 0.197 | 0.41 | 0.01 | 0.7638 | 0.61 | 0.7728 | 0.0655 | 0.8 | 0.5 | 0.05 |
| P58 | HONDA<br>NC750X               | 0.017 | 0.218 | 0.200 | 0.12 | 0.06 | 0.8273 | 0.71 | 0.6860 | 0.2023 | 0.8 | 0.5 | 0.05 |
| P59 | LAGENDA<br>115 XJ6            | 0.012 | 0.212 | 0.211 | 0.34 | 0.33 | 0.5000 | 0.82 | 0.8027 | 0.4170 | 0.7 | 0.8 | 0.05 |
| P60 | LAGENDA<br>115 LC135          | 0.016 | 0.105 | 0.118 | 0.44 | 0.41 | 1.2225 | 0.15 | 0.7522 | 0.3851 | 0.7 | 0.8 | 0.05 |
| P61 | LAGENDA<br>115 XMAX<br>250    | 0.012 | 0.201 | 0.195 | 0.73 | 0.24 | 0.5000 | 0.66 | 0.7630 | 0.2568 | 0.7 | 1.0 | 0.05 |
| P62 | LAGENDA<br>115 XV950R<br>BOLT | 0.019 | 0.259 | 0.250 | 0.71 | 0.50 | 1.0821 | 0.04 | 0.7279 | 0.6924 | 0.7 | 0.8 | 0.05 |
| P63 | HONDA<br>NSS300               | 0.016 | 0.195 | 0.182 | 0.74 | 0.90 | 0.5000 | 0.36 | 0.6863 | 2.4830 | 0.7 | 0.5 | 0.03 |
| P64 | HONDA<br>CBR1000RR            | 0.012 | 0.207 | 0.215 | 0.39 | 0.97 | 0.5000 | 0.31 | 0.8168 | 0.8554 | 0.7 | 0.6 | 0.05 |
| P65 | LAGENDA<br>115 R6             | 0.014 | 0.202 | 0.179 | 0.06 | 0.91 | 0.6340 | 0.48 | 0.7503 | 0.8359 | 0.7 | 0.5 | 0.05 |
| P66 | LAGENDA<br>115 R6             | 0.010 | 0.205 | 0.193 | 0.85 | 0.15 | 0.5000 | 0.94 | 0.8322 | 0.0581 | 0.8 | 0.5 | 0.05 |

---
